# Supplementary material for: Dynamics of RAS/BRAF Mutations in cfDNA from Metastatic Colorectal Carcinoma Patients Treated with Polychemotherapy and Anti-EGFR Monoclonal Antibodies
Source: MDPI journal article supplement (doi:10.3390/cancers14041052), 2022-02-18
Supplement: s1 [file s1]

**Table S1:** Comparison of Idylla and Oncomine Pan Cancer results.

| ID      | Baseline         |                       | 8 Weeks                                                         |                       | PD                                     |                                                                        | PD 3 Months                   |                                              |
|---------|------------------|-----------------------|-----------------------------------------------------------------|-----------------------|----------------------------------------|------------------------------------------------------------------------|-------------------------------|----------------------------------------------|
|         | Idylla           | NGS (AF%)             | Idylla                                                          | NGS                   | Idylla                                 | NGS                                                                    | Idylla                        | NGS                                          |
| 01-0002 | –                | –                     | KRAS: p.G12S (3,9%);<br>BRAF: p.V600E/D    BRAF: p.V600D (1,8%) |                       | –                                      | –                                                                      | –                             | –                                            |
| 01-0005 | –                | TP53: p.R273C (14,6%) | –                                                               | TP53: p.R273C (11,2%) | NRAS: p.Q61R/K                         | NRAS: p.Q61K (2,8%);<br>TP53: p.R273C (7,8%)                           | –                             | –                                            |
| 01-0008 | –                | –                     | –                                                               | –                     | KRAS: p.G12C                           | KRAS: p.G12C (6,4%)                                                    | sample not available          |                                              |
| 01-0010 | KRAS: p.G12R     | KRAS: p.G12R (1,8%)   | –                                                               | –                     | –                                      | FBXW7: p.R465C (1,5%)                                                  | sample not available          |                                              |
| 01-0011 | KRAS: p.G12A     | KRAS: p.G12A (2,2%)   | –                                                               | –                     | KRAS: p.G12A                           | KRAS: p.G12A (3%);<br>TP53: p.R280I (2,5%)                             | KRAS: p.G12A                  | KRAS: p.G12A (3,8%);<br>TP53: p.R280I (2,9%) |
| 01-0014 | KRAS: p.A59T/E/G | KRAS: p.A59T (5,4%)   | –                                                               | –                     | KRAS: p.A59T/E/G                       | KRAS: p.A59T (4,4%)                                                    | Invalid                       | EGFR: p.S492R (0,4%)                         |
| 01-0017 | –                | –                     | KRAS: p.G12A                                                    | KRAS: p.G12A (5,1%)   | BRAF: p.V600E/D                        | BRAF: p.V600E (2,5%)                                                   | –                             | –                                            |
| 01-0019 | KRAS: p.G12D     | KRAS: p.G12D (1,9%)   | KRAS: p.G12D                                                    | KRAS: p.G12D (2%)     | KRAS: p.G12D                           | KRAS: p.G12D (2,5%)                                                    | sample not available          |                                              |
| 01-0024 | –                | –                     | –                                                               | –                     | NRAS: p.Q61H                           | NRAS: p.Q61H (4,1%)                                                    | –                             | –                                            |
| 01-0027 | –                | –                     | –                                                               | –                     | KRAS: p.G12R                           | KRAS: p.G12R (3,4%)                                                    | –                             | –                                            |
| 01-0028 | –                | –                     | –                                                               | –                     | –                                      | –                                                                      | KRAS: p.G12V;<br>NRAS: p.Q61H | KRAS: p.G12V (2,4%)                          |
| 01-0033 | –                | –                     | NRAS: p.A59T                                                    | NRAS: p.A59T (3,4%)   | –                                      | –                                                                      | –                             | –                                            |
| 01-0038 | –                | –                     | NRAS: p.G12A/V                                                  | NRAS: p.G12V (2,2%)   | –                                      | –                                                                      | –                             | –                                            |
| 61-0001 | –                | –                     | sample not available                                            |                       | BRAF: p.V600E/D                        | BRAF: p.V600E (1,9%)                                                   | sample not available          |                                              |
| 06-0002 | –                | TP53: p.R175H (5,4%)  | sample not available                                            |                       | KRAS: p.A146P/T/V;<br>BRAF: p.V600E/D  | KRAS: p.A146T (1,5%);<br>BRAF: p.V600E (3,2%);<br>TP53: p.R175H (2,8%) | sample not available          |                                              |
| 29-0001 | BRAF: p.V600E/D  | BRAF: p.V600E (4,7%)  | BRAF: p.V600E/D                                                 | BRAF: p.V600E (5,7%)  | the sample at week 8 coincided with PD |                                                                        | sample not available          |                                              |
| 26-0002 | –                | –                     | –                                                               | –                     | BRAF: p.V600E/D                        | BRAF: p.V600E (2,6%)                                                   | –                             | –                                            |
| 33-0004 | –                | –                     | –                                                               | –                     | NRAS: p.Q61R/K;<br>BRAF: p.V600E/D     | NRAS: p.Q61K (4,8%);<br>BRAF: p.V600D (2,6%)                           | sample not available          |                                              |
| 57-0002 | –                | –                     | KRAS: p.A146T<br>KRAS: p.A146P/T/V (3,1%)                       |                       | –                                      | –                                                                      | –                             | –                                            |
| 57-0006 | –                | –                     | –                                                               | –                     | KRAS: p.G12C                           | KRAS: p.G12C (4,3%)                                                    | –                             | –                                            |

**Table S2.** mPFS observed between KRAS/NRAS/BRAF mutant versus wild type cases when considering patients mutant at baseline, at week 8, at progression or at any time-point.

| Samples        |     | N  | MEDIAN PFS | P Value | Hazard Ratio (95% CI of Ratio) |
|----------------|-----|----|------------|---------|--------------------------------|
| T0             | WT  | 31 | 7.250      | 0.5818  | 0.7625 (0.2904 to 2.002)       |
|                | MUT | 6  | 7.060      |         |                                |
| T8             | WT  | 25 | 7.590      | 0.8401  | 1.090 (0.4724 to 2.514)        |
|                | MUT | 7  | 6.670      |         |                                |
| PD             | WT  | 23 | 7.130      | 0.3892  | 1.346 (0.6844 to 2.647)        |
|                | MUT | 13 | 7.710      |         |                                |
| Any Time Point | WT  | 17 | 7.130      | 0.5476  | 1.230 (0.6269 to 2.412)        |
|                | MUT | 20 | 7.470      |         |                                |
